# Supplementary material for: Identification and Expression Profiling of Chemosensory Genes in Hermetia illucens via a Transcriptomic Analysis
Source: Front Physiol. 2020 Jun 19;11:720. doi: 10.3389/fphys.2020.00720 (PMC7325966; doi:10.3389/fphys.2020.00720)
Supplement: TABLE S1 — Chemosensory genes from Dipteran species. [file Table_1.XLSX]

## Sheet: OBP
OBPs
Number	Species	Protein name	Accession number
1	Drosophila melanogaster	DmelOBP8a	NP_727322
2	Drosophila melanogaster	DmelOBP18a	NP_573350
3	Drosophila melanogaster	DmelOBP19a	NP_728338
4	Drosophila melanogaster	DmelOBP19b	NP_608391
5	Drosophila melanogaster	DmelOBP19c-A	NP_608392
6	Drosophila melanogaster	DmelOBP19c-C	NP_728340
7	Drosophila melanogaster	DmelOBP19d-A	NP_523421
8	Drosophila melanogaster	DmelOBP19d-B	NP_788940
9	Drosophila melanogaster	DmelOBP22a-C	NP_722746
10	Drosophila melanogaster	DmelOBP22a-B	NP_001014457
11	Drosophila melanogaster	DmelOBP28a	NP_523505
12	Drosophila melanogaster	DmelOBP44a-A	NP_610358
13	Drosophila melanogaster	DmelOBP44a-B	NP_001286186
14	Drosophila melanogaster	DmelOBP46a	NP_610574
15	Drosophila melanogaster	DmelOBP47a-A	NP_610632
16	Drosophila melanogaster	DmelOBP47a-B	NP_995810
17	Drosophila melanogaster	DmelOBP47b	NP_610669
18	Drosophila melanogaster	DmelOBP49a	NP_610812
19	Drosophila melanogaster	DmelOBP50a-A	NP_725385
20	Drosophila melanogaster	DmelOBP50a-B	NP_995832
21	Drosophila melanogaster	DmelOBP50b	NP_725386
22	Drosophila melanogaster	DmelOBP50c	NP_725387
23	Drosophila melanogaster	DmelOBP50d	NP_725388
24	Drosophila melanogaster	DmelOBP50e	NP_610959
25	Drosophila melanogaster	DmelOBP51a	NP_725436
26	Drosophila melanogaster	DmelOBP56a	NP_611442
27	Drosophila melanogaster	DmelOBP56b	NP_611443
28	Drosophila melanogaster	DmelOBP56c-C	NP_725925
29	Drosophila melanogaster	DmelOBP56c-B	NP_995902
30	Drosophila melanogaster	DmelOBP56d-A	NP_611444
31	Drosophila melanogaster	DmelOBP56d-B	NP_001286619
32	Drosophila melanogaster	DmelOBP56e-A	NP_611445
33	Drosophila melanogaster	DmelOBP56e-B	NP_001286620
34	Drosophila melanogaster	DmelOBP56f	NP_725926
35	Drosophila melanogaster	DmelOBP56g-A	NP_611447
36	Drosophila melanogaster	DmelOBP56g-B	NP_995903
37	Drosophila melanogaster	DmelOBP56h-A	NP_611448
38	Drosophila melanogaster	DmelOBP56h-B	NP_001188979
39	Drosophila melanogaster	DmelOBP56i-B	NP_001188980
40	Drosophila melanogaster	DmelOBP56i-A	NP_725929
41	Drosophila melanogaster	DmelOBP57c	NP_611481
42	Drosophila melanogaster	DmelOBP57b-A	NP_725965
43	Drosophila melanogaster	DmelOBP57b-B	NP_001286632
44	Drosophila melanogaster	DmelOBP57a	NP_725966
45	Drosophila melanogaster	DmelOBP57e	NP_611488
46	Drosophila melanogaster	DmelOBP57d	NP_725973
47	Drosophila melanogaster	DmelOBP59a	NP_788429
48	Drosophila melanogaster	DmelOBP58b	NP_611709
49	Drosophila melanogaster	DmelOBP58c	NP_611710
50	Drosophila melanogaster	DmelOBP58d	NP_611711
51	Drosophila melanogaster	DmelOBP69a	NP_524039
52	Drosophila melanogaster	DmelOBP73a	NP_001097628
53	Drosophila melanogaster	DmelOBP83a-C	NP_001287190
54	Drosophila melanogaster	DmelOBP83a-A	NP_524241
55	Drosophila melanogaster	DmelOBP83a-B	NP_001287189
56	Drosophila melanogaster	DmelOBP83b	NP_524242
57	Drosophila melanogaster	DmelOBP83cd	NP_649612
58	Drosophila melanogaster	DmelOBP83ef	NP_731042
59	Drosophila melanogaster	DmelOBP83g	NP_731043
60	Drosophila melanogaster	DmelOBP84a-C	NP_001097700
61	Drosophila melanogaster	DmelOBP84a-A	NP_476990
62	Drosophila melanogaster	DmelOBP85a	NP_649802
63	Drosophila melanogaster	DmelOBP93a	NP_650945
64	Drosophila melanogaster	DmelOBP99a-A	NP_651707
65	Drosophila melanogaster	DmelOBP99a-B	NP_001287586
66	Drosophila melanogaster	DmelOBP99c-A	NP_651711
67	Drosophila melanogaster	DmelOBP99c-B	NP_001263077
68	Drosophila melanogaster	DmelOBP99d	NP_651712
69	Drosophila melanogaster	DmelOBP99b-A	NP_651713
70	Drosophila melanogaster	DmelOBP99b-B	NP_001263078
71	Drosophila melanogaster	DmelOBP-lush	NP_524162
	Musca domestica	MdomOBP1	Scott et al. 2014
	Musca domestica	MdomOBP2	Scott et al. 2014
	Musca domestica	MdomOBP3	Scott et al. 2014
	Musca domestica	MdomOBP4NTE	Scott et al. 2014
	Musca domestica	MdomOBP5	Scott et al. 2014
	Musca domestica	MdomOBP6	Scott et al. 2014
	Musca domestica	MdomOBP7	Scott et al. 2014
	Musca domestica	MdomOBP8	Scott et al. 2014
	Musca domestica	MdomOBP9	Scott et al. 2014
	Musca domestica	MdomOBP10	Scott et al. 2014
	Musca domestica	MdomOBP11	Scott et al. 2014
	Musca domestica	MdomOBP12	Scott et al. 2014
	Musca domestica	MdomOBP13	Scott et al. 2014
	Musca domestica	MdomOBP14	Scott et al. 2014
	Musca domestica	MdomOBP15	Scott et al. 2014
	Musca domestica	MdomOBP16	Scott et al. 2014
	Musca domestica	MdomOBP17	Scott et al. 2014
	Musca domestica	MdomOBP18	Scott et al. 2014
	Musca domestica	MdomOBP19	Scott et al. 2014
	Musca domestica	MdomOBP20	Scott et al. 2014
	Musca domestica	MdomOBP21	Scott et al. 2014
	Musca domestica	MdomOBP22	Scott et al. 2014
	Musca domestica	MdomOBP23	Scott et al. 2014
	Musca domestica	MdomOBP24	Scott et al. 2014
	Musca domestica	MdomOBP25PSE	Scott et al. 2014
	Musca domestica	MdomOBP26	Scott et al. 2014
	Musca domestica	MdomOBP27	Scott et al. 2014
	Musca domestica	MdomOBP28	Scott et al. 2014
	Musca domestica	MdomOBP29	Scott et al. 2014
	Musca domestica	MdomOBP30	Scott et al. 2014
	Musca domestica	MdomOBP31	Scott et al. 2014
	Musca domestica	MdomOBP32	Scott et al. 2014
	Musca domestica	MdomOBP33	Scott et al. 2014
	Musca domestica	MdomOBP34	Scott et al. 2014
	Musca domestica	MdomOBP35	Scott et al. 2014
	Musca domestica	MdomOBP36	Scott et al. 2014
	Musca domestica	MdomOBP37	Scott et al. 2014
	Musca domestica	MdomOBP38	Scott et al. 2014
	Musca domestica	MdomOBP39	Scott et al. 2014
	Musca domestica	MdomOBP40NTE	Scott et al. 2014
	Musca domestica	MdomOBP41	Scott et al. 2014
	Musca domestica	MdomOBP42	Scott et al. 2014
	Musca domestica	MdomOBP43	Scott et al. 2014
	Musca domestica	MdomOBP44	Scott et al. 2014
	Musca domestica	MdomOBP45	Scott et al. 2014
	Musca domestica	MdomOBP46	Scott et al. 2014
	Musca domestica	MdomOBP47	Scott et al. 2014
	Musca domestica	MdomOBP48	Scott et al. 2014
	Musca domestica	MdomOBP49	Scott et al. 2014
	Musca domestica	MdomOBP50	Scott et al. 2014
	Musca domestica	MdomOBP51	Scott et al. 2014
	Musca domestica	MdomOBP52	Scott et al. 2014
	Musca domestica	MdomOBP53	Scott et al. 2014
	Musca domestica	MdomOBP54	Scott et al. 2014
	Musca domestica	MdomOBP55	Scott et al. 2014
	Musca domestica	MdomOBP56	Scott et al. 2014
	Musca domestica	MdomOBP57	Scott et al. 2014
	Musca domestica	MdomOBP58	Scott et al. 2014
	Musca domestica	MdomOBP59	Scott et al. 2014
	Musca domestica	MdomOBP60	Scott et al. 2014
	Musca domestica	MdomOBP61CTE	Scott et al. 2014
	Musca domestica	MdomOBP62	Scott et al. 2014
	Musca domestica	MdomOBP63	Scott et al. 2014
	Musca domestica	MdomOBP64	Scott et al. 2014
	Musca domestica	MdomOBP65	Scott et al. 2014
	Musca domestica	MdomOBP66	Scott et al. 2014
	Musca domestica	MdomOBP67	Scott et al. 2014
	Musca domestica	MdomOBP68	Scott et al. 2014
	Musca domestica	MdomOBP69	Scott et al. 2014
	Musca domestica	MdomOBP70	Scott et al. 2014
	Musca domestica	MdomOBP71	Scott et al. 2014
	Musca domestica	MdomOBP72	Scott et al. 2014
	Musca domestica	MdomOBP73PSE	Scott et al. 2014
	Musca domestica	MdomOBP74	Scott et al. 2014
	Musca domestica	MdomOBP75	Scott et al. 2014
	Musca domestica	MdomOBP76	Scott et al. 2014
	Musca domestica	MdomOBP77	Scott et al. 2014
	Musca domestica	MdomOBP78	Scott et al. 2014
	Musca domestica	MdomOBP79NTE	Scott et al. 2014
	Musca domestica	MdomOBP80	Scott et al. 2014
	Musca domestica	MdomOBP81	Scott et al. 2014
	Musca domestica	MdomOBP82	Scott et al. 2014
	Musca domestica	MdomOBP83INT	Scott et al. 2014
	Musca domestica	MdomOBP84	Scott et al. 2014
	Musca domestica	MdomOBP85	Scott et al. 2014
	Musca domestica	MdomOBP86	Scott et al. 2014
	Musca domestica	MdomOBP87NTE	Scott et al. 2014
72	Bactrocera dorsalis	BdorOBP83a	KP743700
73	Bactrocera dorsalis	BdorOBP19d-1	XP_011211346
74	Bactrocera dorsalis	BdorOBP19d-2	XP_011211361
75	Bactrocera dorsalis	BdorOBP19d-3	XP_011211373
76	Bactrocera dorsalis	BdorOBP56a	XP_011197296
77	Bactrocera dorsalis	BdorOBP56d-1	XP_011197297
78	Bactrocera dorsalis	BdorOBP56d-2	XP_011197302
79	Bactrocera dorsalis	BdorOBP56d-3	XP_011197300
80	Bactrocera dorsalis	BdorOBP56d-4	XP_011197299
81	Bactrocera dorsalis	BdorOBP56h-1	XP_011197304
82	Bactrocera dorsalis	BdorOBP56h-2	XP_011197305
83	Bactrocera dorsalis	BdorOBP57c	XP_011198265
84	Bactrocera dorsalis	BdorOBP84a-1	XP_011198416
85	Bactrocera dorsalis	BdorOBP19d-4	XP_011198811
86	Bactrocera dorsalis	BdorOBP19a-1	XP_011198864
87	Bactrocera dorsalis	BdorOBP19a-2	XP_011198814
88	Bactrocera dorsalis	BdorOBP28a-1	XP_011198820
89	Bactrocera dorsalis	BdorOBP69a	XP_011201434
90	Bactrocera dorsalis	BdorOBP99a-1	XP_011204856
91	Bactrocera dorsalis	BdorOBP99a-2	XP_011205204
92	Bactrocera dorsalis	BdorOBP84a-2	XP_011206667
93	Bactrocera dorsalis	BdorOBP-lush	XP_011208040
94	Bactrocera dorsalis	BdorOBP-A10-X2	XP_011208559
95	Bactrocera dorsalis	BdorOBP71	XP_011208813
96	Bactrocera dorsalis	BdorOBP68	XP_011208814
97	Bactrocera dorsalis	BdorOBP56h-3	XP_011209038
98	Bactrocera dorsalis	BdorOBP56h-4	XP_011209039
99	Bactrocera dorsalis	BdorOBP-A5-1	XP_011210072
100	Bactrocera dorsalis	BdorOBP-A5-2	XP_011210114
101	Bactrocera dorsalis	BdorOBP99a-3	XP_011210417
102	Bactrocera dorsalis	BdorOBP99a-4	XP_011210420
103	Bactrocera dorsalis	BdorOBP99b	XP_011210422
104	Bactrocera dorsalis	BdorOBP99a-5	XP_011210421
105	Bactrocera dorsalis	BdorOBP99a-6	XP_011210423
106	Bactrocera dorsalis	BdorOBP99a-7	XP_011210426
107	Bactrocera dorsalis	BdorOBP99a-8	XP_011210425
108	Bactrocera dorsalis	BdorOBP99a-9	XP_011210427
109	Bactrocera dorsalis	BdorOBP99a-10	XP_011210445
110	Bactrocera dorsalis	BdorOBP99a-11	XP_011212480
111	Bactrocera dorsalis	BdorOBP70	XP_011212952
159	Ceratitis capitata	CcapOBP1	Papanicolaou et al. 2016
160	Ceratitis capitata	CcapOBP2	Papanicolaou et al. 2016
161	Ceratitis capitata	CcapOBP3	Papanicolaou et al. 2016
162	Ceratitis capitata	CcapOBP4	Papanicolaou et al. 2016
163	Ceratitis capitata	CcapOBP5	Papanicolaou et al. 2016
164	Ceratitis capitata	CcapOBP6	Papanicolaou et al. 2016
165	Ceratitis capitata	CcapOBP7	Papanicolaou et al. 2016
166	Ceratitis capitata	CcapOBP8	Papanicolaou et al. 2016
167	Ceratitis capitata	CcapOBP9	Papanicolaou et al. 2016
168	Ceratitis capitata	CcapOBP10	Papanicolaou et al. 2016
169	Ceratitis capitata	CcapOBP11	Papanicolaou et al. 2016
170	Ceratitis capitata	CcapOBP12	Papanicolaou et al. 2016
171	Ceratitis capitata	CcapOBP13	Papanicolaou et al. 2016
172	Ceratitis capitata	CcapOBP14	Papanicolaou et al. 2016
173	Ceratitis capitata	CcapOBP15	Papanicolaou et al. 2016
174	Ceratitis capitata	CcapOBP16	Papanicolaou et al. 2016
175	Ceratitis capitata	CcapOBP17	Papanicolaou et al. 2016
176	Ceratitis capitata	CcapOBP18	Papanicolaou et al. 2016
177	Ceratitis capitata	CcapOBP19	Papanicolaou et al. 2016
178	Ceratitis capitata	CcapOBP20	Papanicolaou et al. 2016
179	Ceratitis capitata	CcapOBP21	Papanicolaou et al. 2016
180	Ceratitis capitata	CcapOBP22	Papanicolaou et al. 2016
181	Ceratitis capitata	CcapOBP23	Papanicolaou et al. 2016
182	Ceratitis capitata	CcapOBP24	Papanicolaou et al. 2016
183	Ceratitis capitata	CcapOBP25	Papanicolaou et al. 2016
184	Ceratitis capitata	CcapOBP26	Papanicolaou et al. 2016
185	Ceratitis capitata	CcapOBP27	Papanicolaou et al. 2016
186	Ceratitis capitata	CcapOBP28	Papanicolaou et al. 2016
187	Ceratitis capitata	CcapOBP29	Papanicolaou et al. 2016
188	Ceratitis capitata	CcapOBP30	Papanicolaou et al. 2016
189	Ceratitis capitata	CcapOBP31	Papanicolaou et al. 2016
190	Ceratitis capitata	CcapOBP32	Papanicolaou et al. 2016
191	Ceratitis capitata	CcapOBP33	Papanicolaou et al. 2016
192	Ceratitis capitata	CcapOBP34	Papanicolaou et al. 2016
193	Ceratitis capitata	CcapOBP35A	Papanicolaou et al. 2016
194	Ceratitis capitata	CcapOBP35B	Papanicolaou et al. 2016
195	Ceratitis capitata	CcapOBP36	Papanicolaou et al. 2016
196	Ceratitis capitata	CcapOBP37A	Papanicolaou et al. 2016
197	Ceratitis capitata	CcapOBP37B	Papanicolaou et al. 2016
198	Ceratitis capitata	CcapOBP38	Papanicolaou et al. 2016
199	Ceratitis capitata	CcapOBP39	Papanicolaou et al. 2016
200	Ceratitis capitata	CcapOBP40	Papanicolaou et al. 2016
201	Ceratitis capitata	CcapOBP41	Papanicolaou et al. 2016
202	Ceratitis capitata	CcapOBP42	Papanicolaou et al. 2016
203	Ceratitis capitata	CcapOBP43	Papanicolaou et al. 2016
204	Ceratitis capitata	CcapOBP44	Papanicolaou et al. 2016
205	Ceratitis capitata	CcapOBP45	Papanicolaou et al. 2016
206	Ceratitis capitata	CcapOBP46	Papanicolaou et al. 2016

## Sheet: CSP
OBPs
Number	Species	Protein name	Accession number
1	Drosophila melanogaster	DmelCSP1	Vieira and Rozas, 2011
2	Drosophila melanogaster	DmelCSP2	Vieira and Rozas, 2011
3	Drosophila melanogaster	DmelCSP3	Vieira and Rozas, 2011
4	Drosophila melanogaster	DmelCSP4	Vieira and Rozas, 2011
5	Bactrocera dorsalis	BdorCSP1	KP743659
6	Bactrocera dorsalis	BdorCSP2	KP743660
7	Bactrocera dorsalis	BdorCSP3	KP743661
8	Bactrocera dorsalis	BdorCSP4	KP743662
10	Musca domestica	MdomCSP1	XP_005177858.1
12	Musca domestica	MdomCSP2	XP_005182272.1
11	Musca domestica	MdomCSP3	XP_005187784.2
9	Musca domestica	MdomCSP4	XP_005183735.1
13	Musca domestica	MdomCSP5	XP_005182271.1
14	Glossina morsitans morsitans	GmmCSP1	FN432801
15	Glossina morsitans morsitans	GmmCSP2	FN432802
16	Glossina morsitans morsitans	GmmCSP3	FN432803
17	Glossina morsitans morsitans	GmmCSP4	FN432804
18	Glossina morsitans morsitans	GmmCSP5	FN432805

## Sheet: OR
ORs
Number	Species	Protein name	Accession number
1	Drosophila melanogaster	DmelOR1a	Robertson et al., 2003
2	Drosophila melanogaster	DmelOR2a	Robertson et al., 2003
3	Drosophila melanogaster	DmelOR7a	Robertson et al., 2003
4	Drosophila melanogaster	DmelOR9a	Robertson et al., 2003
5	Drosophila melanogaster	DmelOR10a	Robertson et al., 2003
6	Drosophila melanogaster	DmelOR13a	Robertson et al., 2003
7	Drosophila melanogaster	DmelOR19a	Robertson et al., 2003
8	Drosophila melanogaster	DmelOR19b	Robertson et al., 2003
9	Drosophila melanogaster	DmelOR22a	Robertson et al., 2003
10	Drosophila melanogaster	DmelOR22b	Robertson et al., 2003
11	Drosophila melanogaster	DmelOR22c	Robertson et al., 2003
12	Drosophila melanogaster	DmelOR23a	Robertson et al., 2003
13	Drosophila melanogaster	DmelOR24a	Robertson et al., 2003
14	Drosophila melanogaster	DmelOR30a	Robertson et al., 2003
15	Drosophila melanogaster	DmelOR33a	Robertson et al., 2003
16	Drosophila melanogaster	DmelOR33b	Robertson et al., 2003
17	Drosophila melanogaster	DmelOR33c	Robertson et al., 2003
18	Drosophila melanogaster	DmelOR35a	Robertson et al., 2003
19	Drosophila melanogaster	DmelOR42a	Robertson et al., 2003
20	Drosophila melanogaster	DmelOR42b	Robertson et al., 2003
21	Drosophila melanogaster	DmelOR43a	Robertson et al., 2003
22	Drosophila melanogaster	DmelOR43b	Robertson et al., 2003
23	Drosophila melanogaster	DmelOR45a	Robertson et al., 2003
24	Drosophila melanogaster	DmelOR45b	Robertson et al., 2003
25	Drosophila melanogaster	DmelOR46aA	Robertson et al., 2003
26	Drosophila melanogaster	DmelOR46aB	Robertson et al., 2003
27	Drosophila melanogaster	DmelOR47a	Robertson et al., 2003
28	Drosophila melanogaster	DmelOR47b	Robertson et al., 2003
29	Drosophila melanogaster	DmelOR49a	Robertson et al., 2003
30	Drosophila melanogaster	DmelOR49b	Robertson et al., 2003
31	Drosophila melanogaster	DmelOR56a	Robertson et al., 2003
32	Drosophila melanogaster	DmelOR59a	Robertson et al., 2003
33	Drosophila melanogaster	DmelOR59b	Robertson et al., 2003
34	Drosophila melanogaster	DmelOR59c	Robertson et al., 2003
35	Drosophila melanogaster	DmelOR63a	Robertson et al., 2003
36	Drosophila melanogaster	DmelOR65a	Robertson et al., 2003
37	Drosophila melanogaster	DmelOR65b	Robertson et al., 2003
38	Drosophila melanogaster	DmelOR65c	Robertson et al., 2003
39	Drosophila melanogaster	DmelOR67a	Robertson et al., 2003
40	Drosophila melanogaster	DmelOR67b	Robertson et al., 2003
41	Drosophila melanogaster	DmelOR67c	Robertson et al., 2003
42	Drosophila melanogaster	DmelOR67d	Robertson et al., 2003
43	Drosophila melanogaster	DmelOR69aA	Robertson et al., 2003
44	Drosophila melanogaster	DmelOR69aB	Robertson et al., 2003
45	Drosophila melanogaster	DmelOR71a	Robertson et al., 2003
46	Drosophila melanogaster	DmelOR74a	Robertson et al., 2003
47	Drosophila melanogaster	DmelOR82a	Robertson et al., 2003
48	Drosophila melanogaster	DmelOR83a	Robertson et al., 2003
49	Drosophila melanogaster	DmelOR83b	Robertson et al., 2003
50	Drosophila melanogaster	DmelOR83c	Robertson et al., 2003
51	Drosophila melanogaster	DmelOR85a	Robertson et al., 2003
52	Drosophila melanogaster	DmelOR85b	Robertson et al., 2003
53	Drosophila melanogaster	DmelOR85c	Robertson et al., 2003
54	Drosophila melanogaster	DmelOR85d	Robertson et al., 2003
55	Drosophila melanogaster	DmelOR85e	Robertson et al., 2003
56	Drosophila melanogaster	DmelOR85f	Robertson et al., 2003
57	Drosophila melanogaster	DmelOR88a	Robertson et al., 2003
58	Drosophila melanogaster	DmelOR92a	Robertson et al., 2003
59	Drosophila melanogaster	DmelOR94a	Robertson et al., 2003
60	Drosophila melanogaster	DmelOR94b	Robertson et al., 2003
61	Drosophila melanogaster	DmelOR98a	Robertson et al., 2003
62	Drosophila melanogaster	DmelOR98b	Robertson et al., 2003
63	Bactrocera dorsalis	BdorOR67c	XP_011198961
64	Bactrocera dorsalis	BdorOR59a.2	XP_011197686
65	Bactrocera dorsalis	BdorOR46a	XP_011200513
66	Bactrocera dorsalis	BdorOR74a	XP_011201924
67	Bactrocera dorsalis	BdorOR69a	XP_011209369
68	Bactrocera dorsalis	BdorOR85e	XP_011198148
69	Bactrocera dorsalis	BdorOR2a	XP_011198390
70	Bactrocera dorsalis	BdorOR7a	XP_011198720
71	Bactrocera dorsalis	BdorOR67c.1	XP_011199152
72	Bactrocera dorsalis	BdorOR7a.1	XP_011199218
73	Bactrocera dorsalis	BdorOR59a	XP_011199471
74	Bactrocera dorsalis	BdorOR24a	XP_011199522
75	Bactrocera dorsalis	BdorOR74a.1	XP_011200119
76	Bactrocera dorsalis	BdorOR67c.2	XP_011200400
77	Bactrocera dorsalis	BdorOR67c.3	XP_011200401
78	Bactrocera dorsalis	BdorOR49b	XP_011201445
79	Bactrocera dorsalis	BdorOR94b	XP_011201446
80	Bactrocera dorsalis	BdorOR94a	XP_011201756
81	Bactrocera dorsalis	BdorOR63a.2	XP_011201815
82	Bactrocera dorsalis	BdorOR63a.3	XP_011201816
83	Bactrocera dorsalis	BdorOR63a.4	XP_011201817
84	Bactrocera dorsalis	BdorOR59a.1	XP_011202260
85	Bactrocera dorsalis	BdorOR67d	XP_011203703
86	Bactrocera dorsalis	BdorOR67d.1	XP_011203704
87	Bactrocera dorsalis	BdorOrco	XP_011203778
88	Bactrocera dorsalis	BdorOR83a	XP_011203872
89	Bactrocera dorsalis	BdorOR83a.1	XP_011203781
90	Bactrocera dorsalis	BdorOR7a.2	XP_011204167
91	Bactrocera dorsalis	BdorOR13a	XP_011204429
92	Bactrocera dorsalis	BdorOR94a.1	XP_011205499
93	Bactrocera dorsalis	BdorOR10a	XP_011206229
94	Bactrocera dorsalis	BdorOR33a	XP_011207938
95	Bactrocera dorsalis	BdorOR33b	XP_011207939
96	Bactrocera dorsalis	BdorOR33b.1	XP_011207940
97	Bactrocera dorsalis	BdorOR7a.3	XP_011208727
98	Bactrocera dorsalis	BdorOR82a	XP_011208732
99	Bactrocera dorsalis	BdorOR7a.4	XP_011208898
100	Bactrocera dorsalis	BdorOR42a	XP_011208899
101	Bactrocera dorsalis	BdorOR33b.2	XP_011208900
102	Bactrocera dorsalis	BdorOR59b	XP_011208901
103	Bactrocera dorsalis	BdorOR92a	XP_011208819
104	Bactrocera dorsalis	BdorOR7a.5	XP_011209572
105	Bactrocera dorsalis	BdorOR7a.6	XP_011209441
106	Bactrocera dorsalis	BdorOR85c	XP_011209575
107	Bactrocera dorsalis	BdorOR85c.1	XP_011209576
108	Bactrocera dorsalis	BdorOR85d	XP_011209577
109	Bactrocera dorsalis	BdorOR85d.1	XP_011209578
110	Bactrocera dorsalis	BdorOR47b	XP_011209987
111	Bactrocera dorsalis	BdorOR22c	XP_011210110
112	Bactrocera dorsalis	BdorOR7a.7	XP_011210512
113	Bactrocera dorsalis	BdorOR43a	XP_011210756
114	Bactrocera dorsalis	BdorOR2	XP_011210757
115	Bactrocera dorsalis	BdorOR30a	XP_011211010
116	Bactrocera dorsalis	BdorOR94a.2	XP_011211752
117	Bactrocera dorsalis	BdorOR49a	XP_011212431
118	Bactrocera dorsalis	BdorOR47a	XP_011212445
119	Bactrocera dorsalis	BdorOR1a	XP_011212446
120	Bactrocera dorsalis	BdorOR45a	XP_011212447
121	Bactrocera dorsalis	BdorOR7a.8	XP_011212981
122	Calliphora stygia	CstyOR120	Leitch et al., 2015
123	Calliphora stygia	CstyOR119	Leitch et al., 2015
124	Calliphora stygia	CstyOR118	Leitch et al., 2015
125	Calliphora stygia	CstyOR117	Leitch et al., 2015
126	Calliphora stygia	CstyOR1159	Leitch et al., 2015
127	Calliphora stygia	CstyOR113-114	Leitch et al., 2015
128	Calliphora stygia	CstyOR111	Leitch et al., 2015
129	Calliphora stygia	CstyOR110	Leitch et al., 2015
130	Calliphora stygia	CstyOR112	Leitch et al., 2015
131	Calliphora stygia	CstyOR108	Leitch et al., 2015
132	Calliphora stygia	CstyOR109	Leitch et al., 2015
133	Calliphora stygia	CstyOR107	Leitch et al., 2015
134	Calliphora stygia	CstyOR106	Leitch et al., 2015
135	Calliphora stygia	CstyOR104-105	Leitch et al., 2015
136	Calliphora stygia	CstyOR88a	Leitch et al., 2015
137	Calliphora stygia	CstyOR85b	Leitch et al., 2015
138	Calliphora stygia	CstyOR83a.2	Leitch et al., 2015
139	Calliphora stygia	CstyOR83a.1	Leitch et al., 2015
140	Calliphora stygia	CstyOR82a	Leitch et al., 2015
141	Calliphora stygia	CstyOR74a	Leitch et al., 2015
142	Calliphora stygia	CstyOR69a	Leitch et al., 2015
143	Calliphora stygia	CstyOR67d	Leitch et al., 2015
144	Calliphora stygia	CstyOR67c	Leitch et al., 2015
145	Calliphora stygia	CstyOR63a	Leitch et al., 2015
146	Calliphora stygia	CstyOR59a.1-2	Leitch et al., 2015
147	Calliphora stygia	CstyOR56a	Leitch et al., 2015
148	Calliphora stygia	CstyOR49b	Leitch et al., 2015
149	Calliphora stygia	CstyOR47b	Leitch et al., 2015
150	Calliphora stygia	CstyOR49a	Leitch et al., 2015
151	Calliphora stygia	CstyOR43a.2	Leitch et al., 2015
152	Calliphora stygia	CstyOR46a	Leitch et al., 2015
153	Calliphora stygia	CstyOR43a.1	Leitch et al., 2015
154	Calliphora stygia	CstyOR30a.2	Leitch et al., 2015
155	Calliphora stygia	CstyOR30a.1	Leitch et al., 2015
156	Calliphora stygia	CstyOR42b	Leitch et al., 2015
157	Calliphora stygia	CstyOR10a	Leitch et al., 2015
158	Calliphora stygia	CstyOR7a.2	Leitch et al., 2015
159	Calliphora stygia	CstyOR13a	Leitch et al., 2015
160	Calliphora stygia	CstyOR2a	Leitch et al., 2015
161	Calliphora stygia	CstyORco	Leitch et al., 2015
162	Calliphora stygia	CstyOR7a.1	Leitch et al., 2015
163	Musca domestica	MdomORco	Scott et al., 2014
164	Musca domestica	MdomOR1	Scott et al., 2014
165	Musca domestica	MdomOR2	Scott et al., 2014
166	Musca domestica	MdomOR3	Scott et al., 2014
167	Musca domestica	MdomOR4	Scott et al., 2014
168	Musca domestica	MdomOR5	Scott et al., 2014
169	Musca domestica	MdomOR6	Scott et al., 2014
170	Musca domestica	MdomOR8	Scott et al., 2014
171	Musca domestica	MdomOR9	Scott et al., 2014
172	Musca domestica	MdomOR10	Scott et al., 2014
173	Musca domestica	MdomOR11	Scott et al., 2014
174	Musca domestica	MdomOR12	Scott et al., 2014
175	Musca domestica	MdomOR13	Scott et al., 2014
176	Musca domestica	MdomOR14	Scott et al., 2014
177	Musca domestica	MdomOR15	Scott et al., 2014
178	Musca domestica	MdomOR16	Scott et al., 2014
179	Musca domestica	MdomOR17	Scott et al., 2014
180	Musca domestica	MdomOR18	Scott et al., 2014
181	Musca domestica	MdomOR19	Scott et al., 2014
182	Musca domestica	MdomOR21	Scott et al., 2014
183	Musca domestica	MdomOR22	Scott et al., 2014
184	Musca domestica	MdomOR23	Scott et al., 2014
185	Musca domestica	MdomOR24	Scott et al., 2014
186	Musca domestica	MdomOR25	Scott et al., 2014
187	Musca domestica	MdomOR26	Scott et al., 2014
188	Musca domestica	MdomOR27	Scott et al., 2014
189	Musca domestica	MdomOR28	Scott et al., 2014
190	Musca domestica	MdomOR29	Scott et al., 2014
191	Musca domestica	MdomOR30	Scott et al., 2014
192	Musca domestica	MdomOR31	Scott et al., 2014
193	Musca domestica	MdomOR33	Scott et al., 2014
194	Musca domestica	MdomOR34	Scott et al., 2014
195	Musca domestica	MdomOR35	Scott et al., 2014
196	Musca domestica	MdomOR36	Scott et al., 2014
197	Musca domestica	MdomOR37	Scott et al., 2014
198	Musca domestica	MdomOR38	Scott et al., 2014
199	Musca domestica	MdomOR39	Scott et al., 2014
200	Musca domestica	MdomOR40	Scott et al., 2014
201	Musca domestica	MdomOR41	Scott et al., 2014
202	Musca domestica	MdomOR42	Scott et al., 2014
203	Musca domestica	MdomOR43	Scott et al., 2014
204	Musca domestica	MdomOR44	Scott et al., 2014
205	Musca domestica	MdomOR45	Scott et al., 2014
206	Musca domestica	MdomOR46	Scott et al., 2014
207	Musca domestica	MdomOR47	Scott et al., 2014
208	Musca domestica	MdomOR48	Scott et al., 2014
209	Musca domestica	MdomOR49	Scott et al., 2014
210	Musca domestica	MdomOR50	Scott et al., 2014
211	Musca domestica	MdomOR51	Scott et al., 2014
212	Musca domestica	MdomOR52	Scott et al., 2014
213	Musca domestica	MdomOR53	Scott et al., 2014
214	Musca domestica	MdomOR54	Scott et al., 2014
215	Musca domestica	MdomOR55	Scott et al., 2014
216	Musca domestica	MdomOR56	Scott et al., 2014
217	Musca domestica	MdomOR57	Scott et al., 2014
218	Musca domestica	MdomOR58	Scott et al., 2014
219	Musca domestica	MdomOR59	Scott et al., 2014
220	Musca domestica	MdomOR60	Scott et al., 2014
221	Musca domestica	MdomOR62	Scott et al., 2014
222	Musca domestica	MdomOR63	Scott et al., 2014
223	Musca domestica	MdomOR64	Scott et al., 2014
224	Musca domestica	MdomOR65	Scott et al., 2014
225	Musca domestica	MdomOR66	Scott et al., 2014
226	Musca domestica	MdomOR67	Scott et al., 2014
227	Musca domestica	MdomOR68	Scott et al., 2014
228	Musca domestica	MdomOR69	Scott et al., 2014
229	Musca domestica	MdomOR70	Scott et al., 2014
230	Musca domestica	MdomOR71	Scott et al., 2014
231	Musca domestica	MdomOR73	Scott et al., 2014
232	Musca domestica	MdomOR74	Scott et al., 2014
233	Musca domestica	MdomOR75	Scott et al., 2014
234	Musca domestica	MdomOR76	Scott et al., 2014
235	Musca domestica	MdomOR77	Scott et al., 2014
236	Musca domestica	MdomOR78	Scott et al., 2014
237	Musca domestica	MdomOR79	Scott et al., 2014
238	Musca domestica	MdomOR80	Scott et al., 2014
239	Musca domestica	MdomOR81	Scott et al., 2014
240	Musca domestica	MdomOR82	Scott et al., 2014
241	Musca domestica	MdomOR83	Scott et al., 2014
242	Musca domestica	MdomOR84A	Scott et al., 2014
243	Musca domestica	MdomOR84B	Scott et al., 2014

## Sheet: IR
IRs
Number	Species	Protein name	Accession number
1	Drosophila melanogaster	DmelIR100a	Croset et al., 2010
2	Drosophila melanogaster	DmelIR10a	Croset et al., 2010
3	Drosophila melanogaster	DmelIR11a	Croset et al., 2010
4	Drosophila melanogaster	DmelIR20a	Croset et al., 2010
5	Drosophila melanogaster	DmelIR21a	Croset et al., 2010
6	Drosophila melanogaster	DmelIR25a	Croset et al., 2010
7	Drosophila melanogaster	DmelIR31a	Croset et al., 2010
8	Drosophila melanogaster	DmelIR40a	Croset et al., 2010
9	Drosophila melanogaster	DmelIR41a	Croset et al., 2010
10	Drosophila melanogaster	DmelIR47a	Croset et al., 2010
11	Drosophila melanogaster	DmelIR48b	Croset et al., 2010
12	Drosophila melanogaster	DmelIR48c	Croset et al., 2010
13	Drosophila melanogaster	DmelIR51b	Croset et al., 2010
14	Drosophila melanogaster	DmelIR52a	Croset et al., 2010
15	Drosophila melanogaster	DmelIR52b	Croset et al., 2010
16	Drosophila melanogaster	DmelIR52c	Croset et al., 2010
17	Drosophila melanogaster	DmelIR52d	Croset et al., 2010
18	Drosophila melanogaster	DmelIR54a	Croset et al., 2010
19	Drosophila melanogaster	DmelIR56a	Croset et al., 2010
20	Drosophila melanogaster	DmelIR56b	Croset et al., 2010
21	Drosophila melanogaster	DmelIR56c	Croset et al., 2010
22	Drosophila melanogaster	DmelIR56d	Croset et al., 2010
23	Drosophila melanogaster	DmelIR60a	Croset et al., 2010
24	Drosophila melanogaster	DmelIR60b	Croset et al., 2010
25	Drosophila melanogaster	DmelIR60d	Croset et al., 2010
26	Drosophila melanogaster	DmelIR60e	Croset et al., 2010
27	Drosophila melanogaster	DmelIR62a	Croset et al., 2010
28	Drosophila melanogaster	DmelIR64a	Croset et al., 2010
29	Drosophila melanogaster	DmelIR67b	Croset et al., 2010
30	Drosophila melanogaster	DmelIR67c	Croset et al., 2010
31	Drosophila melanogaster	DmelIR68a	Croset et al., 2010
32	Drosophila melanogaster	DmelIR68b	Croset et al., 2010
33	Drosophila melanogaster	DmelIR75a	Croset et al., 2010
34	Drosophila melanogaster	DmelIR75b	Croset et al., 2010
35	Drosophila melanogaster	DmelIR75c	Croset et al., 2010
36	Drosophila melanogaster	DmelIR75d	Croset et al., 2010
37	Drosophila melanogaster	DmelIR76a	Croset et al., 2010
38	Drosophila melanogaster	DmelIR76b	Croset et al., 2010
39	Drosophila melanogaster	DmelIR7a	Croset et al., 2010
40	Drosophila melanogaster	DmelIR7b	Croset et al., 2010
41	Drosophila melanogaster	DmelIR7c	Croset et al., 2010
42	Drosophila melanogaster	DmelIR7d	Croset et al., 2010
43	Drosophila melanogaster	DmelIR7e	Croset et al., 2010
44	Drosophila melanogaster	DmelIR7f	Croset et al., 2010
45	Drosophila melanogaster	DmelIR7g	Croset et al., 2010
46	Drosophila melanogaster	DmelIR84a	Croset et al., 2010
47	Drosophila melanogaster	DmelIR85a	Croset et al., 2010
48	Drosophila melanogaster	DmelIR87a	Croset et al., 2010
49	Drosophila melanogaster	DmelIR8a	Croset et al., 2010
50	Drosophila melanogaster	DmelIR92a	Croset et al., 2010
51	Drosophila melanogaster	DmelIR93a	Croset et al., 2010
52	Drosophila melanogaster	DmelIR94a	Croset et al., 2010
53	Drosophila melanogaster	DmelIR94b	Croset et al., 2010
54	Drosophila melanogaster	DmelIR94c	Croset et al., 2010
55	Drosophila melanogaster	DmelIR94d	Croset et al., 2010
56	Drosophila melanogaster	DmelIR94e	Croset et al., 2010
57	Drosophila melanogaster	DmelIR94f	Croset et al., 2010
58	Drosophila melanogaster	DmelIR94g	Croset et al., 2010
59	Drosophila melanogaster	DmelIR94h	Croset et al., 2010
60	Drosophila melanogaster	DmelGluRIIA	Croset et al., 2010
61	Drosophila melanogaster	DmelCG3822	Croset et al., 2010
62	Drosophila melanogaster	DmelCG5621	Croset et al., 2010
63	Drosophila melanogaster	DmelCG9935	Croset et al., 2010
64	Drosophila melanogaster	DmelCG11155	Croset et al., 2010
65	Drosophila melanogaster	DmelClumsy	Croset et al., 2010
66	Drosophila melanogaster	DmelGluR1	Croset et al., 2010
67	Drosophila melanogaster	DmelGluR1B	Croset et al., 2010
68	Drosophila melanogaster	DmelGluRIIB	Croset et al., 2010
69	Drosophila melanogaster	DmelGluRIIC	Croset et al., 2010
70	Drosophila melanogaster	DmelGluRIID	Croset et al., 2010
71	Drosophila melanogaster	DmelGluRIIE	Croset et al., 2010
72	Drosophila melanogaster	DmelNmdar.1	Croset et al., 2010
73	Drosophila melanogaster	DmelNmdar.2	Croset et al., 2010
74	Calliphora stygia	CstyIR25a	Leitch et al., 2015
75	Calliphora stygia	CstyIR8a	Leitch et al., 2015
76	Calliphora stygia	CstyIR110	Leitch et al., 2015
77	Calliphora stygia	CstyIR108-109	Leitch et al., 2015
78	Calliphora stygia	CstyIR107	Leitch et al., 2015
79	Calliphora stygia	CstyIR106	Leitch et al., 2015
80	Calliphora stygia	CstyIR105	Leitch et al., 2015
81	Calliphora stygia	CstyIR104	Leitch et al., 2015
82	Calliphora stygia	CstyIR103	Leitch et al., 2015
83	Calliphora stygia	CstyIR102	Leitch et al., 2015
84	Calliphora stygia	CstyIR101	Leitch et al., 2015
85	Calliphora stygia	CstyIR93a	Leitch et al., 2015
86	Calliphora stygia	CstyIR92a	Leitch et al., 2015
87	Calliphora stygia	CstyIR76b	Leitch et al., 2015
88	Calliphora stygia	CstyIR76a.2	Leitch et al., 2015
89	Calliphora stygia	CstyIR76a.1	Leitch et al., 2015
90	Calliphora stygia	CstyIR75d	Leitch et al., 2015
91	Calliphora stygia	CstyIR64a	Leitch et al., 2015
92	Calliphora stygia	CstyIR41a	Leitch et al., 2015
93	Calliphora stygia	CstyIR40a	Leitch et al., 2015
94	Calliphora stygia	CstyIR31a	Leitch et al., 2015
95	Ceratitis capitata	CcapIR8a	Papanicolaou et al. 2016
96	Ceratitis capitata	CcapIR10a	Papanicolaou et al. 2016
97	Ceratitis capitata	CcapIR21a	Papanicolaou et al. 2016
98	Ceratitis capitata	CcapIR25a	Papanicolaou et al. 2016
99	Ceratitis capitata	CcapIR31a	Papanicolaou et al. 2016
100	Ceratitis capitata	CcapIR40a	Papanicolaou et al. 2016
101	Ceratitis capitata	CcapIR41a	Papanicolaou et al. 2016
102	Ceratitis capitata	CcapIR60a	Papanicolaou et al. 2016
103	Ceratitis capitata	CcapIR64a	Papanicolaou et al. 2016
104	Ceratitis capitata	CcapIR68a	Papanicolaou et al. 2016
105	Ceratitis capitata	CcapIR68b1	Papanicolaou et al. 2016
106	Ceratitis capitata	CcapIR68b2	Papanicolaou et al. 2016
107	Ceratitis capitata	CcapIR75a	Papanicolaou et al. 2016
108	Ceratitis capitata	CcapIR75b	Papanicolaou et al. 2016
109	Ceratitis capitata	CcapIR75d	Papanicolaou et al. 2016
110	Ceratitis capitata	CcapIR76a	Papanicolaou et al. 2016
111	Ceratitis capitata	CcapIR76b	Papanicolaou et al. 2016
112	Ceratitis capitata	CcapIR84a	Papanicolaou et al. 2016
113	Ceratitis capitata	CcapIR85a	Papanicolaou et al. 2016
114	Ceratitis capitata	CcapIR87a	Papanicolaou et al. 2016
115	Ceratitis capitata	CcapIR92a	Papanicolaou et al. 2016
116	Ceratitis capitata	CcapIR93a	Papanicolaou et al. 2016
117	Ceratitis capitata	CcapIR101	Papanicolaou et al. 2016
118	Ceratitis capitata	CcapIR102	Papanicolaou et al. 2016
119	Ceratitis capitata	CcapIR103	Papanicolaou et al. 2016
120	Ceratitis capitata	CcapIR104	Papanicolaou et al. 2016
121	Ceratitis capitata	CcapIR105	Papanicolaou et al. 2016
122	Ceratitis capitata	CcapIR106	Papanicolaou et al. 2016
123	Ceratitis capitata	CcapIR107	Papanicolaou et al. 2016
124	Ceratitis capitata	CcapIR108	Papanicolaou et al. 2016
125	Ceratitis capitata	CcapIR109	Papanicolaou et al. 2016
126	Ceratitis capitata	CcapIR112	Papanicolaou et al. 2016
127	Ceratitis capitata	CcapIR114	Papanicolaou et al. 2016
128	Ceratitis capitata	CcapIR115	Papanicolaou et al. 2016
129	Ceratitis capitata	CcapIR116	Papanicolaou et al. 2016
130	Ceratitis capitata	CcapIR117	Papanicolaou et al. 2016
131	Ceratitis capitata	CcapIR118	Papanicolaou et al. 2016
132	Ceratitis capitata	CcapIR119	Papanicolaou et al. 2016
133	Ceratitis capitata	CcapIR120	Papanicolaou et al. 2016
134	Ceratitis capitata	CcapIR121	Papanicolaou et al. 2016
135	Ceratitis capitata	CcapIR124	Papanicolaou et al. 2016
136	Ceratitis capitata	CcapIR126	Papanicolaou et al. 2016
137	Ceratitis capitata	CcapIR127	Papanicolaou et al. 2016
138	Ceratitis capitata	CcapIR128	Papanicolaou et al. 2016
139	Ceratitis capitata	CcapIR129	Papanicolaou et al. 2016
140	Ceratitis capitata	CcapIR130	Papanicolaou et al. 2016
141	Ceratitis capitata	CcapIR131	Papanicolaou et al. 2016
142	Ceratitis capitata	CcapIR132	Papanicolaou et al. 2016
143	Ceratitis capitata	CcapIR133	Papanicolaou et al. 2016
144	Ceratitis capitata	CcapIR134	Papanicolaou et al. 2016
145	Ceratitis capitata	CcapIR136	Papanicolaou et al. 2016
146	Ceratitis capitata	CcapIR138	Papanicolaou et al. 2016
147	Ceratitis capitata	CcapIR139	Papanicolaou et al. 2016
148	Ceratitis capitata	CcapIR140	Papanicolaou et al. 2016
149	Ceratitis capitata	CcapIR141	Papanicolaou et al. 2016
150	Ceratitis capitata	CcapIR143	Papanicolaou et al. 2016
151	Ceratitis capitata	CcapIR144	Papanicolaou et al. 2016
152	Ceratitis capitata	CcapIR145	Papanicolaou et al. 2016
153	Ceratitis capitata	CcapIR146	Papanicolaou et al. 2016
154	Ceratitis capitata	CcapIR147	Papanicolaou et al. 2016

## Sheet: GR
GRs
Number	Species	Protein name	Accession number
1	Drosophila melanogaster	DmelGR2a	Robertson et al., 2003
2	Drosophila melanogaster	DmelGR5a	Robertson et al., 2003
3	Drosophila melanogaster	DmelGR8a	Robertson et al., 2003
4	Drosophila melanogaster	DmelGR9a	Robertson et al., 2003
5	Drosophila melanogaster	DmelGR10a	Robertson et al., 2003
6	Drosophila melanogaster	DmelGR10b	Robertson et al., 2003
7	Drosophila melanogaster	DmelGR21a	Robertson et al., 2003
8	Drosophila melanogaster	DmelGR22a	Robertson et al., 2003
9	Drosophila melanogaster	DmelGR22b	Robertson et al., 2003
10	Drosophila melanogaster	DmelGR22c	Robertson et al., 2003
11	Drosophila melanogaster	DmelGR22d	Robertson et al., 2003
12	Drosophila melanogaster	DmelGR22e	Robertson et al., 2003
13	Drosophila melanogaster	DmelGR22f	Robertson et al., 2003
14	Drosophila melanogaster	DmelGR23aA	Robertson et al., 2003
15	Drosophila melanogaster	DmelGR23aB	Robertson et al., 2003
16	Drosophila melanogaster	DmelGR28a	Robertson et al., 2003
17	Drosophila melanogaster	DmelGR28b	Robertson et al., 2003
18	Drosophila melanogaster	DmelGR28b	Robertson et al., 2003
19	Drosophila melanogaster	DmelGR28b	Robertson et al., 2003
20	Drosophila melanogaster	DmelGR28b	Robertson et al., 2003
21	Drosophila melanogaster	DmelGR28b	Robertson et al., 2003
22	Drosophila melanogaster	DmelGR32a	Robertson et al., 2003
23	Drosophila melanogaster	DmelGR33a	Robertson et al., 2003
24	Drosophila melanogaster	DmelGR36a	Robertson et al., 2003
25	Drosophila melanogaster	DmelGR36b	Robertson et al., 2003
26	Drosophila melanogaster	DmelGR36c	Robertson et al., 2003
27	Drosophila melanogaster	DmelGR39a	Robertson et al., 2003
28	Drosophila melanogaster	DmelGR39a	Robertson et al., 2003
29	Drosophila melanogaster	DmelGR39a	Robertson et al., 2003
30	Drosophila melanogaster	DmelGR39a	Robertson et al., 2003
31	Drosophila melanogaster	DmelGR39b	Robertson et al., 2003
32	Drosophila melanogaster	DmelGR43a	Robertson et al., 2003
33	Drosophila melanogaster	DmelGR47a	Robertson et al., 2003
34	Drosophila melanogaster	DmelGR47b	Robertson et al., 2003
35	Drosophila melanogaster	DmelGR57a	Robertson et al., 2003
36	Drosophila melanogaster	DmelGR58a	Robertson et al., 2003
37	Drosophila melanogaster	DmelGR58b	Robertson et al., 2003
38	Drosophila melanogaster	DmelGR58c	Robertson et al., 2003
39	Drosophila melanogaster	DmelGR59a	Robertson et al., 2003
40	Drosophila melanogaster	DmelGR59b	Robertson et al., 2003
41	Drosophila melanogaster	DmelGR59c	Robertson et al., 2003
42	Drosophila melanogaster	DmelGR59d	Robertson et al., 2003
43	Drosophila melanogaster	DmelGR59e	Robertson et al., 2003
44	Drosophila melanogaster	DmelGR59f	Robertson et al., 2003
45	Drosophila melanogaster	DmelGR61a	Robertson et al., 2003
46	Drosophila melanogaster	DmelGR63a	Robertson et al., 2003
47	Drosophila melanogaster	DmelGR64a	Robertson et al., 2003
48	Drosophila melanogaster	DmelGR64b	Robertson et al., 2003
49	Drosophila melanogaster	DmelGR64c	Robertson et al., 2003
50	Drosophila melanogaster	DmelGR64d	Robertson et al., 2003
51	Drosophila melanogaster	DmelGR64e	Robertson et al., 2003
52	Drosophila melanogaster	DmelGR64f	Robertson et al., 2003
53	Drosophila melanogaster	DmelGR66a	Robertson et al., 2003
54	Drosophila melanogaster	DmelGR68a	Robertson et al., 2003
55	Drosophila melanogaster	DmelGR77a	Robertson et al., 2003
56	Drosophila melanogaster	DmelGR85a	Robertson et al., 2003
57	Drosophila melanogaster	DmelGR89a	Robertson et al., 2003
58	Drosophila melanogaster	DmelGR92a	Robertson et al., 2003
59	Drosophila melanogaster	DmelGR93a	Robertson et al., 2003
60	Drosophila melanogaster	DmelGR93b	Robertson et al., 2003
61	Drosophila melanogaster	DmelGR93c	Robertson et al., 2003
62	Drosophila melanogaster	DmelGR93d	Robertson et al., 2003
63	Drosophila melanogaster	DmelGR94a	Robertson et al., 2003
64	Drosophila melanogaster	DmelGR97a	Robertson et al., 2003
65	Drosophila melanogaster	DmelGR98a	Robertson et al., 2003
66	Drosophila melanogaster	DmelGR98b	Robertson et al., 2003
67	Drosophila melanogaster	DmelGR98c	Robertson et al., 2003
68	Drosophila melanogaster	DmelGR98d	Robertson et al., 2003
69	Bactrocera dorsalis	BdorGR58b	XP_011198456
70	Bactrocera dorsalis	BdorGR64a	XP_011213351
71	Bactrocera dorsalis	BdorGR64b	XP_011213352
72	Bactrocera dorsalis	BdorGR64c	XP_011213354
73	Bactrocera dorsalis	BdorGR64e	XP_011213347
74	Bactrocera dorsalis	BdorGR5a	XP_011213355
75	Bactrocera dorsalis	BdorGR5a.1	XP_011213356
76	Bactrocera dorsalis	BdorGR28b	XP_011199051
77	Bactrocera dorsalis	BdorGR28a	XP_011198978
78	Bactrocera dorsalis	BdorGR39b	XP_011199292
79	Bactrocera dorsalis	BdorGR39b.1	XP_011206820
80	Bactrocera dorsalis	BdorGR39b.2	XP_011206822
81	Bactrocera dorsalis	BdorGR39b.3	XP_011206823
82	Bactrocera dorsalis	BdorGR43a	XP_011200933
83	Bactrocera dorsalis	BdorGR43a.1	XP_011200972
84	Bactrocera dorsalis	BdorGR43a.2	XP_011200973
85	Bactrocera dorsalis	BdorGR8a	XP_011201900
86	Bactrocera dorsalis	BdorGR8a.1	XP_011201887
87	Bactrocera dorsalis	BdorGR57a	XP_011202263
88	Bactrocera dorsalis	BdorGR66a	XP_011202622
89	Bactrocera dorsalis	BdorGR66a.1	XP_011207478
90	Bactrocera dorsalis	BdorGR93a	XP_011202660
91	Bactrocera dorsalis	BdorGR93c	XP_011202661
92	Bactrocera dorsalis	BdorGR89a	XP_011202839
93	Bactrocera dorsalis	BdorGR98b	XP_011205406
94	Bactrocera dorsalis	BdorGR10a	XP_011206228
95	Bactrocera dorsalis	BdorGR36b	XP_011206230
96	Bactrocera dorsalis	BdorGR59d	XP_011206231
97	Bactrocera dorsalis	BdorGR59b	XP_011206232
98	Bactrocera dorsalis	BdorGR23a	XP_011206815
99	Bactrocera dorsalis	BdorGR23a.1	XP_011206817
100	Bactrocera dorsalis	BdorGR2a	XP_011206818
101	Bactrocera dorsalis	BdorGR2a.1	XP_011209756
102	Bactrocera dorsalis	BdorGR47b	XP_011207333
103	Bactrocera dorsalis	BdorGR59f	XP_011207607
104	Bactrocera dorsalis	BdorGR68a	XP_011210108
105	Bactrocera dorsalis	BdorGR22e	XP_011210745
106	Bactrocera dorsalis	BdorGR22e.1	XP_011210746
107	Bactrocera dorsalis	BdorGR22e.2	XP_011210747
108	Bactrocera dorsalis	BdorGR22e.3	XP_011210748
109	Bactrocera dorsalis	BdorGR21a	XP_011204023
110	Bactrocera dorsalis	BdorGR63a	XP_011212836
111	Calliphora stygia	CstyGR108	Leitch et al., 2015
112	Calliphora stygia	CstyGR107	Leitch et al., 2015
113	Calliphora stygia	CstyGR106	Leitch et al., 2015
114	Calliphora stygia	CstyGR105	Leitch et al., 2015
115	Calliphora stygia	CstyGR104	Leitch et al., 2015
116	Calliphora stygia	CstyGR103	Leitch et al., 2015
117	Calliphora stygia	CstyGR102	Leitch et al., 2015
118	Calliphora stygia	CstyGR101	Leitch et al., 2015
119	Calliphora stygia	CstyGR100	Leitch et al., 2015
120	Calliphora stygia	CstyGR93a	Leitch et al., 2015
121	Calliphora stygia	CstyGR66a	Leitch et al., 2015
122	Calliphora stygia	CstyGR64e	Leitch et al., 2015
123	Calliphora stygia	CstyGR64b	Leitch et al., 2015
124	Calliphora stygia	CstyGR64a	Leitch et al., 2015
125	Calliphora stygia	CstyGR63a	Leitch et al., 2015
126	Calliphora stygia	CstyGR43a	Leitch et al., 2015
127	Calliphora stygia	CstyGR28b	Leitch et al., 2015
128	Calliphora stygia	CstyGR28a	Leitch et al., 2015
129	Calliphora stygia	CstyGR21a	Leitch et al., 2015
130	Calliphora stygia	CstyGR10a	Leitch et al., 2015

## Sheet: SNMP
SNMPs
Number	Species	Protein name	Accession number
1	Drosophila melanogaster	DmelSNMP1	NP_650953
2	Drosophila melanogaster	DmelSNMP2	ABW70129.1
3	Bactrocera dorsalis	BdorSNMP1-1	AKI29050.1
4	Bactrocera dorsalis	BdorSNMP1-2	AKI29051.1
5	Bactrocera dorsalis	BdorSNMP2	AKI29052.1
6	Musca domestica	MdomSNMP1	Scott et al., 2014
7	Musca domestica	MdomSNMP2	Scott et al., 2014
